# Supplementary material for: Value-based care pathway for inflammatory bowel disease: a protocol for the multicentre longitudinal non-randomised parallel cluster IBD Value study with baseline period
Source: PubMed Central journal article supplement — BMJ Open. 2022 Jan 12;12(1):e050539. doi: 10.1136/bmjopen-2021-050539 (PMC8756277; doi:10.1136/bmjopen-2021-050539), 2022-01-12
Supplement: bmjopen-2021-050539supp002.pdf [file bmjopen-2021-050539supp002.pdf]

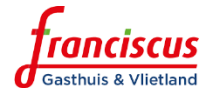

# Informatie voor deelname aan medisch-wetenschappelijk onderzoek

## Verbeteren van de zorg voor mensen met een chronische darmontsteking

*Officiële titel: Waardegedreven zorg voor inflammatoire darmziekten: het verbeteren van (kosten-)effectiviteit*

### Inleiding

Geachte heer/mevrouw,

U ontvangt deze brief omdat u een chronische darmontsteking (ziekte van Crohn of colitis ulcerosa) heeft en gaat starten met een behandeling met krachtige ontstekingsremmers (biological) of deze al gebruikt. Wij vragen u om mee te doen aan een medisch-wetenschappelijk onderzoek. Dit onderzoek gaat over de verbetering van de zorg voor mensen met een chronische darmontsteking. Meedoen is vrijwillig. Om mee te doen, hebben wij wel uw schriftelijke toestemming nodig.

Voordat u beslist of u wilt meedoen aan dit onderzoek, krijgt u uitleg over wat het onderzoek inhoudt. Lees deze informatie rustig door en vraag de onderzoeker om uitleg als u vragen heeft. U kunt ook de onafhankelijk deskundige, die aan het eind van deze brief genoemd wordt, om aanvullende informatie vragen. U kunt er ook over praten met uw partner, vrienden of familie.

### 1. Achtergrond van het onderzoek

Mensen met een chronische darmontsteking kunnen veel klachten hebben en moeten soms dure ontstekingsremmende medicijnen gebruiken. Er wordt steeds meer onderzoek gedaan naar chronische darmontsteking. Ook komen er steeds meer medicijnen om chronische darmontsteking te behandelen. Door de nieuwe informatie en behandelingen wordt de zorg voor chronische darmontsteking ingewikkelder. Daarom werken MDL-artsen in het Zuidwesten van Nederland samen om de zorg te verbeteren. Er wordt een zorgpad ontwikkeld, zodat iedereen op een vergelijkbare manier wordt behandeld in de regio. Een zorgpad is een stappenplan, met daarin praktische adviezen over keuzes tijdens de behandeling van chronische darmontsteking.

### 2. Doel van het onderzoek

Het doel van het onderzoek is om de zorg te verbeteren voor mensen met een chronische darmontsteking die sterke ontstekingsremmers krijgen. Door gegevens te verzamelen over de uitkomsten van uw behandeling kunnen wij kijken wat er goed gaat, en wat er beter kan.



Daarnaast kijken wij ook naar de kosten van de behandeling, en de kosten die u zelf maakt. Wij hopen met dit onderzoek de kwaliteit van zorg te verbeteren en de kosten te reduceren.

### 3. Wat meedoen inhoudt

Meedoen houdt in dat u tot maart 2023 vragenlijsten invult over de zorg die u krijgt. U krijgt dezelfde behandeling als normaal. De ziekenhuizen zijn ingedeeld in twee groepen, een groep ziekenhuizen die volgens het nieuwe zorgpad werkt en een groep ziekenhuizen die dit niet doet. Door deze twee groepen te vergelijken kunnen we kijken of het zorgpad ook echt beter is dan de huidige situatie.

Door de COVID-19 pandemie kan het gebeuren dat de start van deze studie moet worden uitgesteld. Als de start wordt uitgesteld begint u later met het invullen van vragenlijsten. In dat geval loopt de studie langer door en vragen wij u ook om door te gaan met het invullen van de vragenlijsten. Mocht dit het geval zijn, dan laten wij u dat weten.

#### Anders dan bij gebruikelijke zorg

Als u meedoet met het onderzoek wordt u niet anders behandeld dan normaal. Eerst willen wij de zorg die u nu krijgt evalueren. Daarom vragen wij u om vragenlijsten in te vullen. In december 2021 zal het zorgpad geïntroduceerd worden. Dit is voor alle patiënten, dus ook als u niet meedoet aan het onderzoek. Dit kan bijvoorbeeld betekenen dat de MDL-artsen afspreken dat u vaker, of minder vaak op de polikliniek moet komen. Wij willen dan kijken of deze verandering beter is.

#### Vragenlijsten

Voor dit onderzoek willen wij u vragen om enkele vragenlijsten in te vullen.

- Aan het begin van het onderzoek, en elk jaar krijgt u een vragenlijst opgestuurd via de e-mail om te kijken naar uw persoonlijke omstandigheden, de aanwezigheid van andere ziekten en uw leefstijl. Het invullen kost u ongeveer 5 minuten.
- U krijgt elke drie maanden een vragenlijst toegestuurd via de e-mail. Deze vragen gaan over hoe de ziekte uw werk beïnvloedt, en de (zorg)kosten die u maakt door uw ziekte. Het invullen kost u ongeveer 5 minuten.
- Daarnaast krijgt u elke 6 maanden een vragenlijst toegestuurd via de mail om de invloed van de ziekte op uw leven en uw kwaliteit van leven te meten. Het invullen kost u ongeveer 10 minuten.

Daarnaast zullen wij ook aan uw behandelend specialist gegevens vragen over de uitkomsten van uw behandeling. Dit gaat bijvoorbeeld over het verloop van uw ziekte, en welke medicijnen u gebruikt.

### 4. Afspraken

Om het onderzoek goed te laten verlopen, is het belangrijk dat u de vragenlijsten invult volgens de uitleg.



Het is belangrijk dat u contact opneemt met de onderzoeker:

- als u niet meer wilt meedoen aan het onderzoek.
- als uw contactgegevens wijzigen.

## 5. Mogelijke voor- en nadelen

Het is belangrijk dat u de mogelijke voor- en nadelen goed afweegt voordat u besluit mee te doen. Als u meedoet aan dit onderzoek betekent het niet dat u minder last krijgt van uw ziekte. Maar u draagt wel bij aan meer kennis over de behandeling van chronische darmziekten, en aan de verbetering hiervan. Een nadeel van het meedoen aan het onderzoek kan zijn dat het invullen van de vragenlijsten u tijd kost.

## 6. Als u niet wilt meedoen of wilt stoppen met het onderzoek

U beslist zelf of u meedoet aan het onderzoek. Deelname is vrijwillig. Als u niet wilt meedoen, wordt u op de gebruikelijke manier behandeld voor uw chronische darmziekte. Dit is niet anders dan als u wel mee zou doen met het onderzoek.

Als u wel meedoet, kunt u zich altijd bedenken en toch stoppen, ook tijdens het onderzoek. U wordt dan op dezelfde manier behandeld voor uw chronische darmziekte. U hoeft niet te zeggen waarom u stopt. Wel moet u dit direct melden aan de onderzoeker. De gegevens die tot dat moment zijn verzameld, worden gebruikt voor het onderzoek.

Als er nieuwe informatie over het onderzoek is die belangrijk voor u is, laat de onderzoeker dit aan u weten. U wordt dan gevraagd of u blijft meedoen.

## 7. Algemene informatie

Dit onderzoek is opgezet door het Franciscus Gasthuis & Vlietland en wordt gedaan door artsen in verschillende ziekenhuizen in de regio Rotterdam. Voor dit onderzoek worden alle patiënten benaderd die in de regio Rotterdam behandeld worden met een sterke ontstekingsremmer voor een chronische darmontsteking.

De studie is aangemeld bij de medisch-ethische toetsingscommissie (METC) Erasmus MC die heeft bepaald dat deze studie niet valt onder de wet medische wetenschappelijk onderzoek met mensen. Dat betekent dat deze studie niet door de METC goedgekeurd hoeft te worden.

## 8. Einde van het onderzoek

Uw deelname aan het onderzoek stopt als

- alle vragenlijsten ingevuld zijn
- u zelf kiest om te stoppen
- de onderzoeker het beter voor u vindt om te stoppen
- het Franciscus Gasthuis & Vlietland of de overheid besluit om het onderzoek te stoppen.



Het hele onderzoek is afgelopen als alle deelnemers klaar zijn. Na het verwerken van alle gegevens informeert de onderzoeker u over de belangrijkste uitkomsten van het onderzoek. Dit gebeurt ongeveer 6 maanden na uw deelname. Als u dit niet wilt, dan kunt u dit tegen de onderzoeker zeggen. Hij mag het u dan niet vertellen.

## **9. Gebruik en bewaren van uw gegevens**

Voor dit onderzoek worden uw persoonsgegevens verzameld, gebruikt en bewaard. Het gaat om gegevens zoals uw naam, geboortjaar en om gegevens over uw gezondheid. Het verzamelen, gebruiken en bewaren van uw gegevens is nodig om de vragen die in dit onderzoek worden gesteld te kunnen beantwoorden en de resultaten te kunnen publiceren. Wij vragen voor het gebruik van uw gegevens uw toestemming.

### **Vertrouwelijkheid van uw gegevens**

Om uw privacy te beschermen krijgen uw gegevens een code. Uw naam en andere gegevens die u direct kunnen identificeren worden daarbij weggelaten. Alleen met de sleutel van de code zijn gegevens tot u te herleiden. De sleutel van de code blijft veilig opgeborgen in de lokale onderzoeksinstelling. De gegevens die naar de opdrachtgever worden gestuurd, bevatten alleen de code en uw e-mailadres om de vragenlijsten te versturen, maar niet uw naam of andere gegevens waarmee u kunt worden geïdentificeerd. Ook in rapporten en publicaties over het onderzoek zijn de gegevens niet tot u te herleiden.

### **Toegang tot uw gegevens voor controle**

Sommige personen kunnen op de onderzoekslocatie toegang krijgen tot al uw gegevens. Ook tot de gegevens zonder code. Dit is nodig om te kunnen controleren of het onderzoek goed en betrouwbaar is uitgevoerd. Personen die ter controle inzage krijgen in uw gegevens zijn: onderzoekers en studenten die hen hierbij assisteren, een monitor die voor de opdrachtgever van het onderzoek werkt, en nationale en internationale toezichhoudende autoriteiten, bijvoorbeeld, de Inspectie Gezondheidszorg en Jeugd. Zij houden uw gegevens geheim. Wij vragen u voor deze inzage toestemming te geven.

### **Bewaren en gebruik van gegevens**

Uw gegevens moeten 15 jaar worden bewaard op de onderzoekslocatie en 15 jaar bij de opdrachtgever. Uw gegevens kunnen na afloop van dit onderzoek ook nog van belang zijn voor ander wetenschappelijk onderzoek op het gebied van chronische darmontsteking. U kunt op het toestemmingsformulier aangeven of u hier wel of niet mee instemt. Indien u hier niet mee instemt, kunt u gewoon deelnemen aan het huidige onderzoek. Uw bewaarde gegevens zullen dan niet gebruikt worden voor ander wetenschappelijk onderzoek.

### **Intrekken toestemming**

U kunt uw toestemming voor gebruik van uw persoonsgegevens altijd weer intrekken. Dit geldt voor dit onderzoek en ook voor het bewaren en het gebruik voor het toekomstige



onderzoek. De onderzoeksgegevens die zijn verzameld tot het moment dat u uw toestemming intrekt, worden nog wel gebruikt in het onderzoek.

### **Meer informatie over uw rechten bij verwerking van gegevens**

Voor algemene informatie over uw rechten bij verwerking van uw persoonsgegevens kunt u de website van de Autoriteit Persoonsgegevens raadplegen. Bij vragen over uw rechten kunt u contact opnemen met de verantwoordelijke voor de verwerking van uw persoonsgegevens. Voor dit onderzoek is dat: het Franciscus Gasthuis & Vlietland. Zie bijlage A voor contactgegevens en website.

Bij vragen of klachten over de verwerking van uw persoonsgegevens raden we u aan eerst contact op te nemen met de onderzoekslocatie. U kunt ook contact opnemen met de Functionaris voor de Gegevensbescherming van de instelling (zie bijlage A) of de Autoriteit Persoonsgegevens.

### **Registratie van het onderzoek**

Informatie over dit onderzoek is ook opgenomen in een overzicht van medisch-wetenschappelijke onderzoeken namelijk (<https://www.trialregister.nl/trial/8276>). Daarin zijn geen gegevens opgenomen die naar u herleidbaar zijn. Na het onderzoek kan de website een samenvatting van de resultaten van dit onderzoek tonen.

## **10. Geen vergoeding voor meedoen**

Het meedoen aan het onderzoek kost u niets. U wordt niet betaald voor het meedoen aan dit onderzoek.

## **11. Heeft u vragen?**

Bij vragen kunt u contact opnemen met de onderzoeker. Voor onafhankelijk advies over meedoen aan dit onderzoek kunt u terecht bij de onafhankelijke arts. Hij weet veel over het onderzoek, maar heeft niets te maken met dit onderzoek.

Indien u klachten heeft over het onderzoek, kunt u dit bespreken met de onderzoeker of uw behandelend arts. Wilt u dit liever niet, dan kunt u zich wenden tot de klachtenfunctionaris of klachtencommissie van het Franciscus Gasthuis & Vlietland. Alle gegevens vindt u in bijlage A: Contactgegevens.

## **12. Ondertekening toestemmingsformulier**

Indien u besluit mee te doen met dit onderzoek, vragen wij u dit op de bijbehorende toestemmingsverklaring schriftelijk te bevestigen. Door uw schriftelijke toestemming geeft u aan dat u de informatie heeft begrepen en instemt met deelname aan het onderzoek. Zowel uzelf als de onderzoeker ontvangen een getekende versie van deze toestemmingsverklaring.

Dank voor uw aandacht.

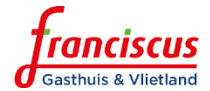

### **13. Bijlagen bij deze informatie**

- A. Contactgegevens
- B. Toestemmingsformulier(en)



## **Bijlage A: contactgegevens voor Franciscus Gasthuis & Vlietland**

Als u nog vragen heeft over dit onderzoek, neem dan contact op met de onderzoeksarts of zijn of haar onderzoeksmedewerkers:

- de hoofdonderzoekers: dr. D. Leemreis-van Noord en dr. R.L. West, 010-4616161
- de coördinerend onderzoeker: drs. R.C.A. van Linschoten, 010-4617838
- de onafhankelijk arts: Dr. G.J. Braunstahl, 010-4616161
- Buiten kantooruren kunt u met het algemene nummer van het ziekenhuis bellen:
  - Franciscus Gasthuis: 010-461 61 61
  - Franciscus Vlietland: 010-893 93 93

en vragen naar de dienstdoend arts van de Maag-, Darm-, en Leverziekten.

### **Cliëntvertrouwenspersoon:**

Deze studie wordt uitgevoerd met toestemming van de Raad van Bestuur van dit ziekenhuis. Het *Franciscus Gasthuis & Vlietland* vindt het belangrijk dat patiënten, proefpersonen en bezoekers tevreden zijn. Toch kan het gebeuren dat u niet tevreden bent en een klacht wilt indienen. In dat geval kunt u het beste eerst praten met de onderzoeksarts of uw behandelend arts. Als u dat liever niet doet, kunt u ook contact opnemen met de cliëntvertrouwenspersoon van het ziekenhuis. Dit kan zowel telefonisch als door het invullen van het online klachtenformulier.

Contact met de cliëntvertrouwenspersoon voor compliment, suggestie of klacht:

### **Franciscus Gasthuis en Franciscus Berkel**

Telefoonnummer: 010 – 461 6701

### **Franciscus Vlietland, Franciscus Haven, Franciscus Hoogvliet en Franciscus Maassluis**

Telefoonnummer: 010 – 893 4125

Digitaal via [www.franciscus.nl/klacht](http://www.franciscus.nl/klacht) (voor alle locaties)

### **Functionaris Gegevensbescherming (alle locaties):**

Mw. L. Pollinger

E-mail: [fg@franciscus.nl](mailto:fg@franciscus.nl)

Telefoonnummer: 010-4616898



## Bijlage B: toestemmingsformulier deelnemer

### Waardegedreven zorg voor inflammatoire darmziekten: IBD Value

- Ik heb de informatiebrief gelezen. Ook kon ik vragen stellen. Mijn vragen zijn voldoende beantwoord. Ik had genoeg tijd om te beslissen of ik meedoe.
- Ik weet dat meedoen vrijwillig is. Ook weet ik dat ik op ieder moment kan beslissen om toch niet mee te doen of te stoppen met het onderzoek. Daarvoor hoef ik geen reden te geven.
- Ik geef toestemming om, in het geval ik tijdens de looptijd van het onderzoek zou komen te overlijden, mijn officiële doodsoorzaakgegevens op te vragen bij het Centraal Bureau voor de Statistiek.
- Ik geef toestemming voor het opvragen van informatie bij mijn specialist(en) die mij behandelt over de uitkomsten van de behandeling van mijn chronische darmontsteking.
- Ik geef toestemming voor het verzamelen en gebruiken van mijn gegevens voor de beantwoording van de onderzoeksvraag in dit onderzoek.
- Ik weet dat voor de controle van het onderzoek sommige mensen toegang tot al mijn gegevens kunnen krijgen. Die mensen staan vermeld in deze informatiebrief. Ik geef toestemming voor die inzage door deze personen.
- Ik geef toestemming om mijn e-mailadres aan het onderzoeksteam door te geven, zodat de vragenlijsten naar mij verstuurd kunnen worden.
- Ik geef  **wel**  **geen**  
toestemming om mijn persoonsgegevens langer te bewaren en te gebruiken voor toekomstig onderzoek op het gebied van chronische darmontsteking.
- Ik geef  **wel**  **geen**  
toestemming om mij na dit onderzoek opnieuw te benaderen voor een vervolgonderzoek.
- Ik wil  **wel**  **niet**  
geïnformeerd worden over de uitkomsten van dit onderzoek.
- Ik wil meedoen aan dit onderzoek.

Naam deelnemer:

E-mailadres:

Handtekening:

Datum : \_\_ / \_\_ / \_\_

-----  
*De deelnemer krijgt een volledige informatiebrief mee.*
